# Supplementary material for: A New Ultrasensitive Bioluminescence-Based Method for Assaying Monoacylglycerol Lipase
Source: MDPI journal article supplement (doi:10.3390/ijms22116148), 2021-06-07
Supplement: s1 [file s1]

## Supplemental Data

### **A new ultrasensitive bioluminescence-based method for assaying Monoacylglycerol lipase**

Matteo Miceli<sup>a</sup>, Silvana Casati<sup>a</sup>, Pietro Allevi<sup>b</sup>, Silvia Berra<sup>a</sup>, Bruce R. Branchini<sup>c</sup>, Roberta Ottria<sup>a</sup>,  
Paola Rota<sup>b</sup>, and Pierangela Ciuffreda<sup>a\*</sup>

- a. Dipartimento di Scienze Biomediche e Cliniche “Luigi Sacco”, Università degli Studi di Milano, Via G.B. Grassi 74, 20157 Milano, Italy.*
- b. Dipartimento di Scienze Biomediche, Chirurgiche e Odontoiatriche, Dipartimento di Scienze Biomediche, Università degli Studi di Milano, Via della Commenda 10, 20122 Milano, Italy.*
- c. Department of Chemistry, Connecticut College, New London, CT 06320, United States*

## <sup>1</sup>H and <sup>13</sup>C-NMR data

### Instruments

<sup>1</sup>H-NMR spectra were recorded in CDCl<sub>3</sub> (isotopic enrichment 99.95%) solutions at 300 K using a Bruker AVANCE 500 instrument (500.13 MHz for <sup>1</sup>H, 125.76 MHz for <sup>13</sup>C) using 5 mm inverse detection broadband probes and deuterium lock. Chemical shifts (δ) are given as parts per million relative to the residual solvent peak (7.26 ppm for <sup>1</sup>H and 77.0, central line, for <sup>13</sup>C) and coupling constants (*J*) are in Hertz. The experimental error in the measured <sup>1</sup>H-<sup>1</sup>H coupling constants is ± 0.5 Hz. The splitting pattern abbreviations are as follows: s, singlet; d, doublet; t, triplet; q, quartet; m, multiplet, and bs, broad peak. For two-dimensional experiments, Bruker microprograms using gradient selection (gs) were applied. Acquisition parameters for 1D were as follows: <sup>1</sup>H spectral width of 5000 Hz and 32 K data points providing a digital resolution of ca. 0.305 Hz per point, relaxation delay 2 s; <sup>13</sup>C spectral width of 29412 Hz and 64 K data points providing a digital resolution of ca. 0.898 Hz per point, relaxation delay 2.5 s.

For two-dimensional experiments, standard Bruker microprograms using gradient selection (gs) were applied. COSY-45 experiments were acquired with 512 t1 increments; 2048 t2 points; spectral/spectrum width 10.0 ppm. The acquisition data for HSQC and HMBC experiments were obtained with 512 t1 increments; 2048 t2 points; spectral/spectrum width 10.0 ppm for <sup>1</sup>H and 220 ppm for <sup>13</sup>C. Delay values were optimized for <sup>1</sup>*J*<sub>C,H</sub> 140.0 Hz and <sup>1</sup>*J*<sub>C,H</sub> 3.0 Hz. Zero filling in F1 to 1 K, π/2 shifted sine-bell squared (for gHSQC) or sinebell (for gHMBC) apodization functions were used for processing.

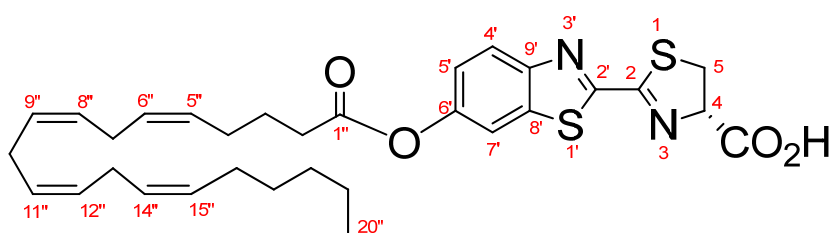

**Figure S1.** IUPAC numbering of 6-*O*-arachidonoylluciferin

<sup>1</sup>H spectrum of 6-*O*-arachidonoylluciferin (**1**)

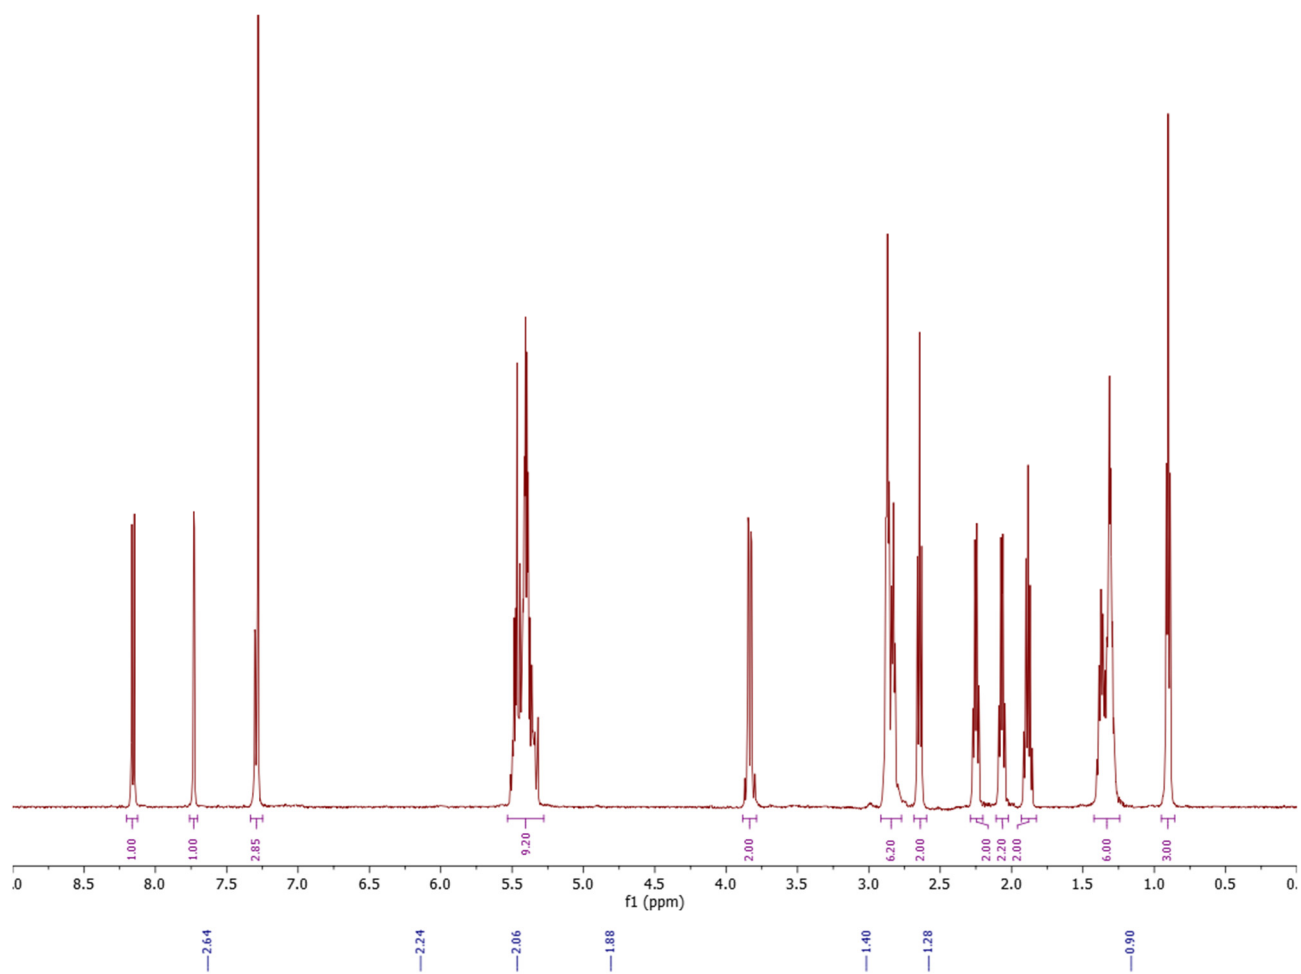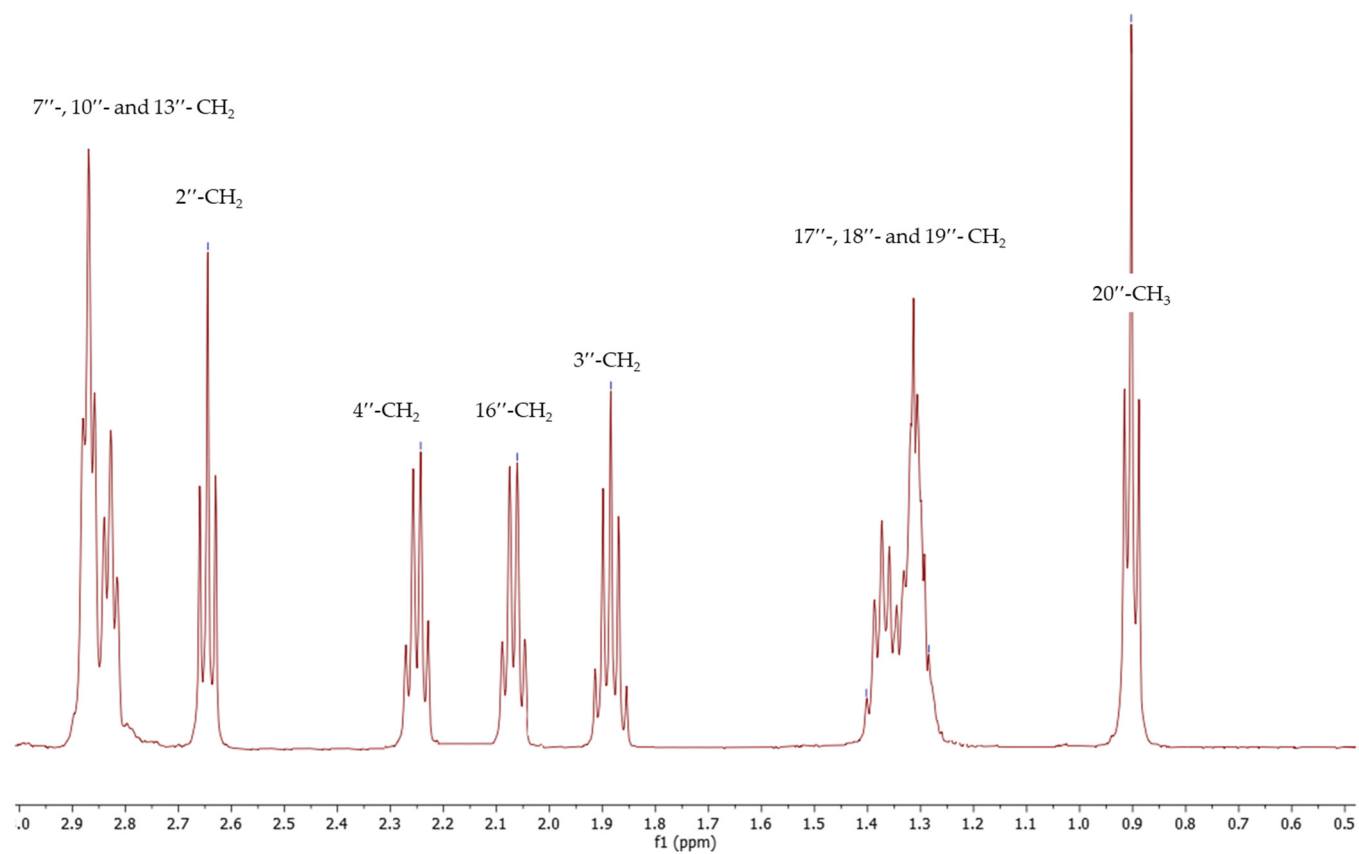

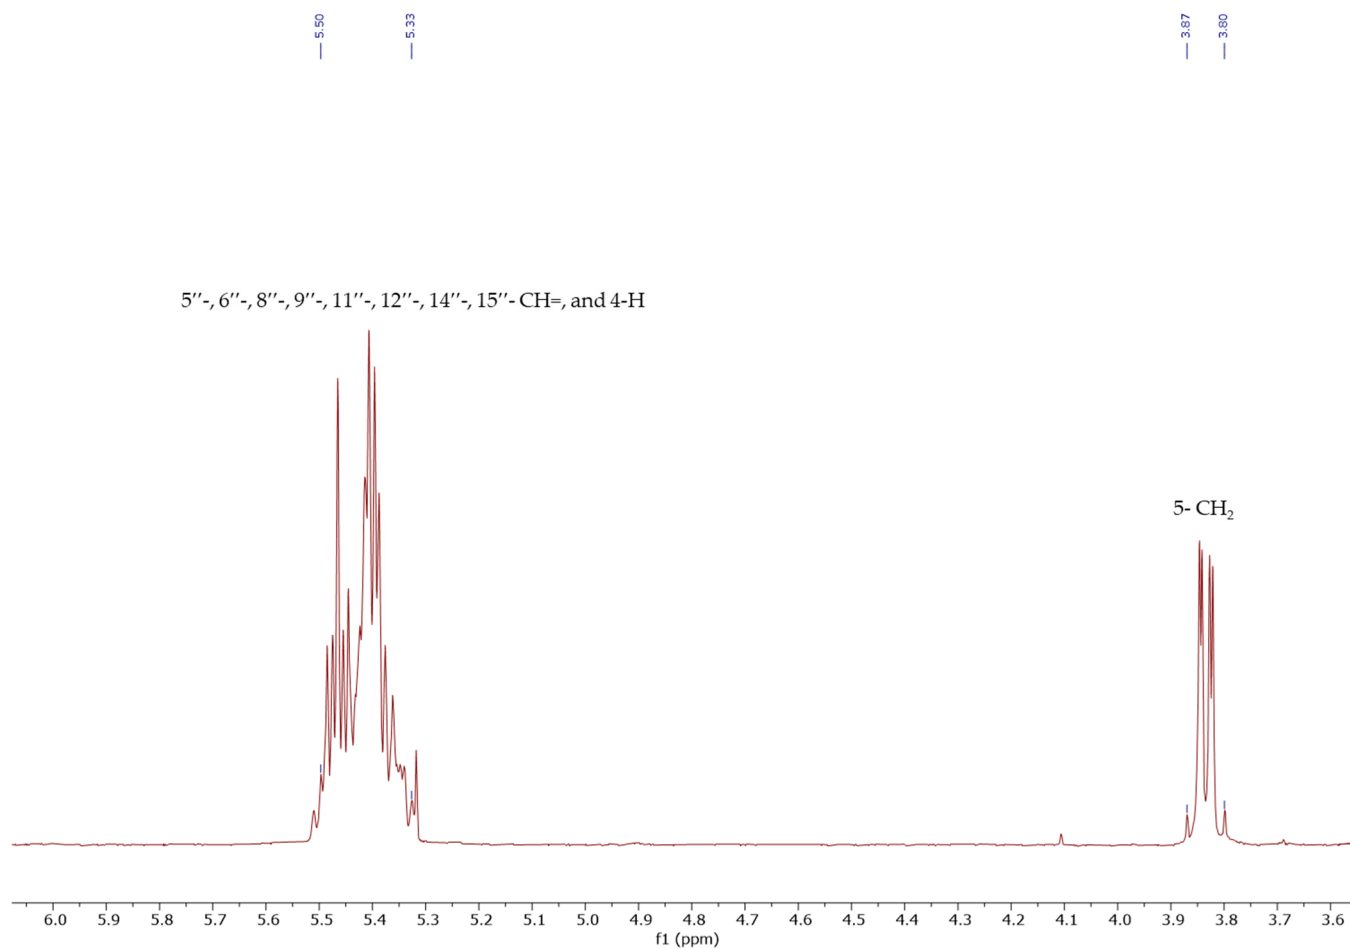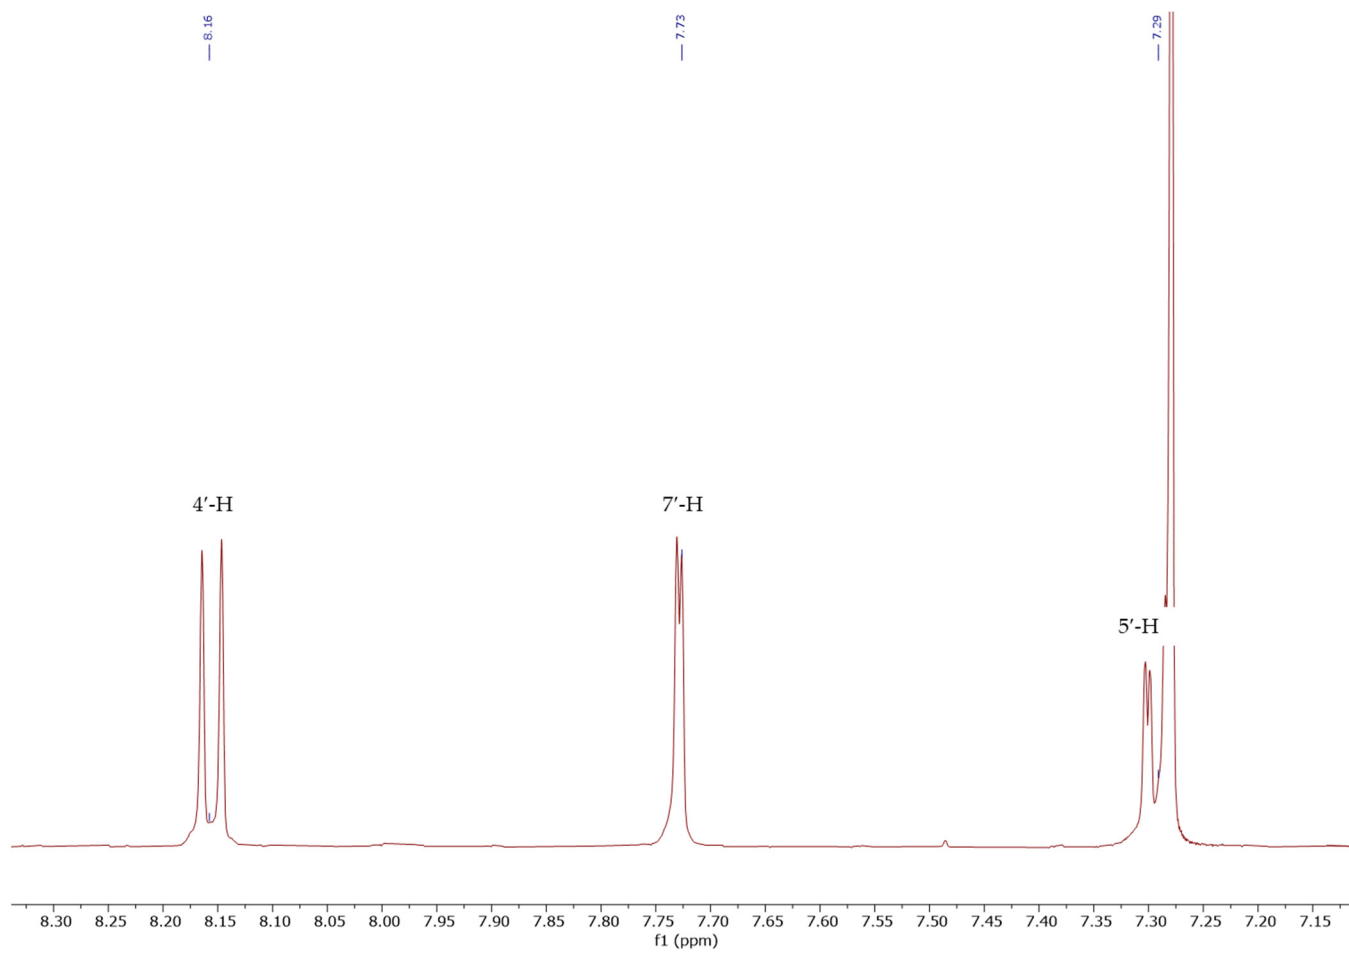

$^1\text{H}$  NMR ( $\text{CDCl}_3$ , 500 MHz):  $\delta$  (ppm) 0.90 (3H, t,  $J=7.6$ ,  $20''\text{-CH}_3$ ), 1.28-1.40 (6 H, m,  $17''\text{-}$ ,  $18''\text{-}$ ,  $19''\text{-CH}_2$ ), 1.88 (2H, tt,  $J=7.0$ , 7.6 Hz,  $3''\text{-CH}_2$ ), 2.06 (2H, dt,  $J=7.6$ , 7.6 Hz,  $16''\text{-CH}_2$ ), 2.24 (2H, dt,  $J=7.0$ , 7.4 Hz,  $4''\text{-CH}_2$ ), 2.64 (2H, t,  $J=7.0$  Hz,  $2''\text{-CH}_2$ ), 2.82-2.88 (6H, m,  $7''\text{-}$   $10''\text{-}$  and  $13''\text{-CH}_2$ ), 3.80-3.87 (2H, AB part of ABX system, 5a- and 5b-H), 5.32-5.50 (9H, m,  $5''\text{-}$   $6''\text{-}$   $8''\text{-}$   $9''\text{-}$   $11''\text{-}$   $12''\text{-}$   $14''\text{-}$   $15''\text{-CH}$  and 4-H), 7.29 (1H, dd,  $J=2.3$ , 8.9 Hz,  $5'\text{-H}$ ), 7.73 (1H, d,  $J=2.3$  Hz,  $7'\text{-H}$ ), 8.16 (1H, d,  $J=8.9$  Hz,  $4'\text{-H}$ ).

<sup>13</sup>C NMR spectrum of 6-*O*-arachidonoylluciferin (**1**)

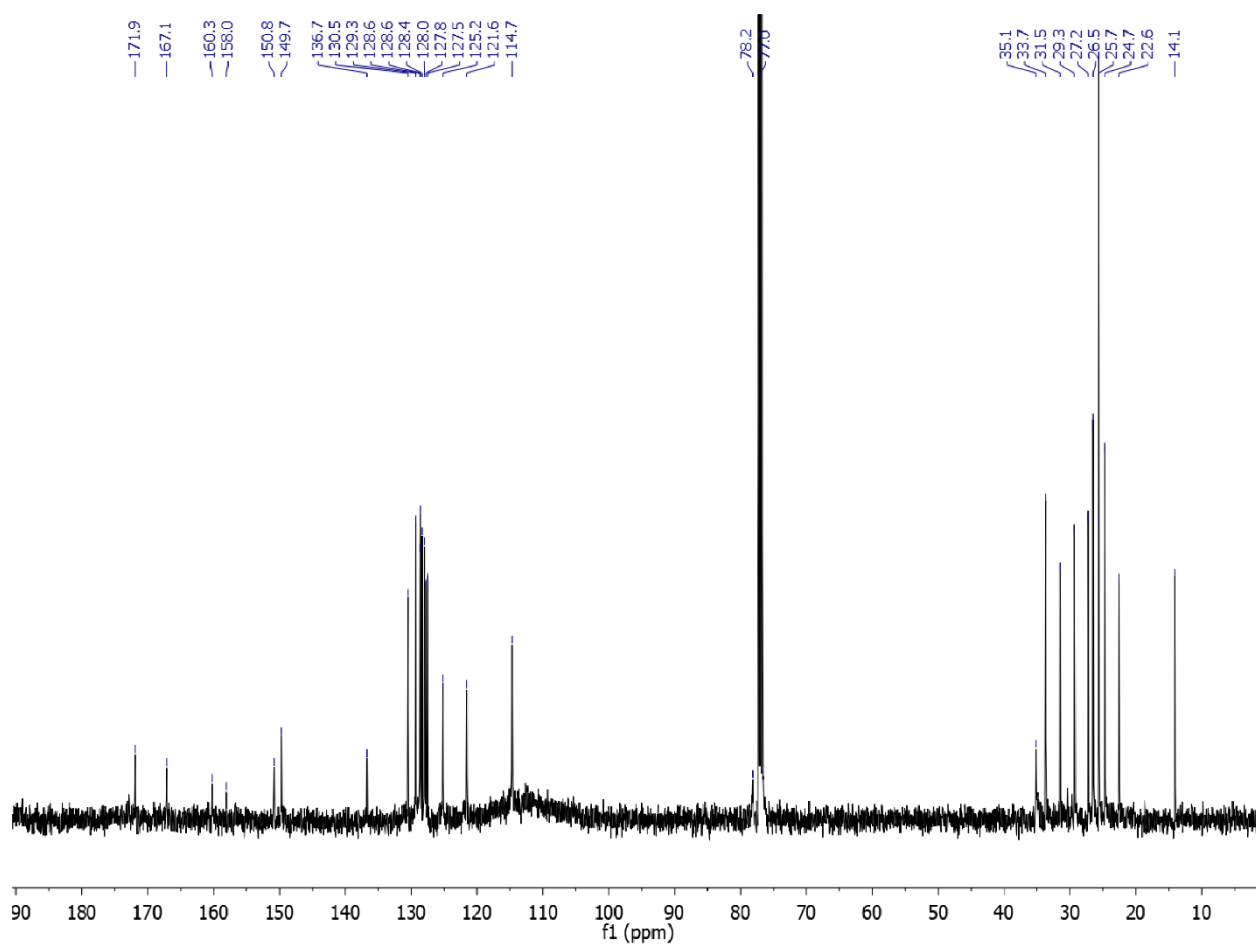

<sup>13</sup>C NMR (CDCl<sub>3</sub>, 125.76 MHz): δ (ppm) 14.1 (20''), 22.6 (19''), 24.7 (3''), 25.7 (7'', 10'', 13''), 26.5 (4''), 27.2 (16''), 29.3 (17''), 31.5 (18''), 33.7 (2''), 35.1 (5), 78.2 (4), 114.7 (7'), 121.6 (5), 125.2 (4), 127.5, 127.8, 128.0, 128.4, 128.6, 128.6, 129.3, 130.5 (5', 6', 8', 9', 11', 12', 14', 15'), 136.7 (8'), 149.7 (6'), 150.8 (9'), 158.0 (2), 160.3 (2'), 167.1(1''), 171.9 (COOH).
